# Supplementary material for: Seipin and the membrane-shaping protein Pex30 cooperate in organelle budding from the endoplasmic reticulum
Source: PubMed Central journal article supplement (PMC6063905; doi:10.1038/s41467-018-05278-2), 2018-07-27
Supplement: 41467_2018_5278_MOESM1_ESM.pdf [file 41467_2018_5278_MOESM1_ESM.pdf]

**Seipin and the membrane shaping protein Pex30 cooperate in organelle budding from the endoplasmic reticulum**

**Wang & Idrissi *et al.* Supplementary Information**

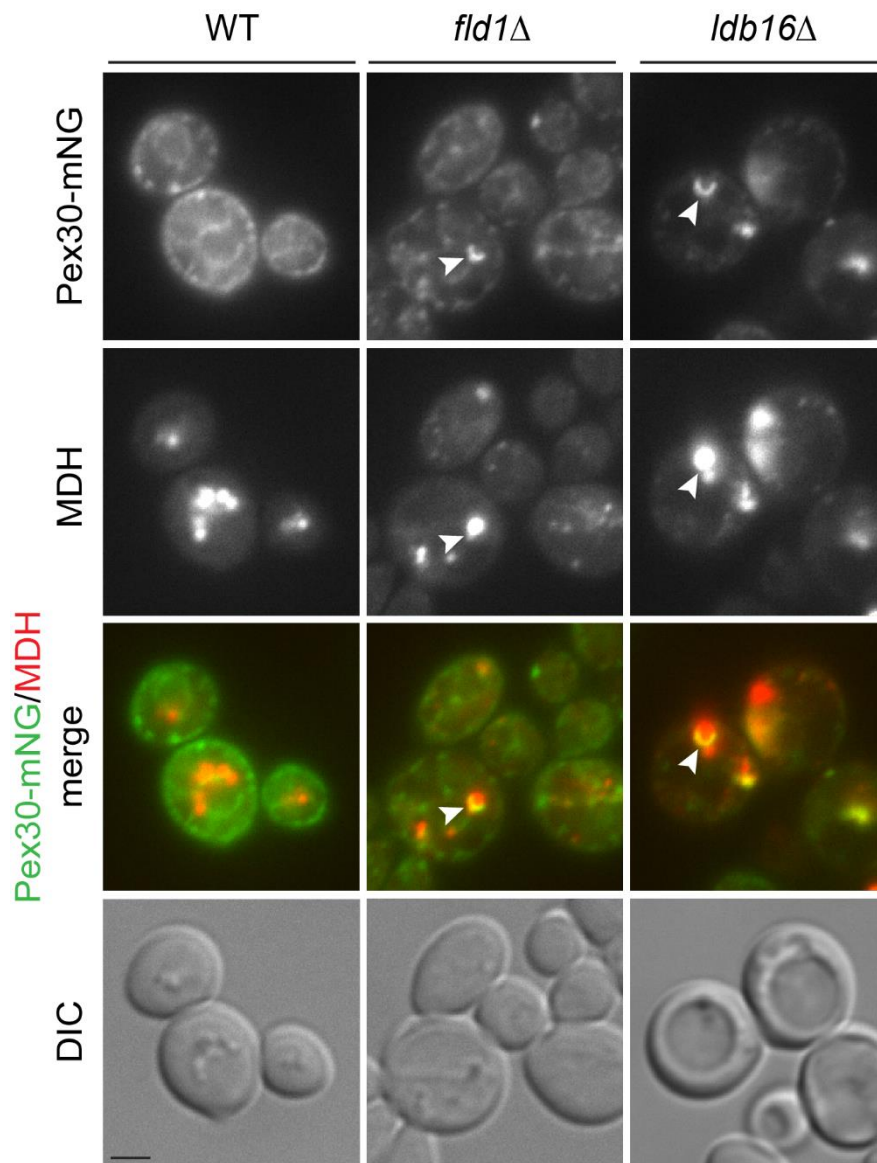

**Supplementary Figure 1. Pex30 enrichment at ER-LD contacts (a)** Pex30 is enriched at abnormal ER-LD contacts in *fld1*Δ and *ldb16*Δ mutants. Endogenous Pex30 was chromosomally tagged with monomeric Neon Green (Pex30-mNG). LDs were stained with the neutral lipid dye MDH. Bar 2μm.

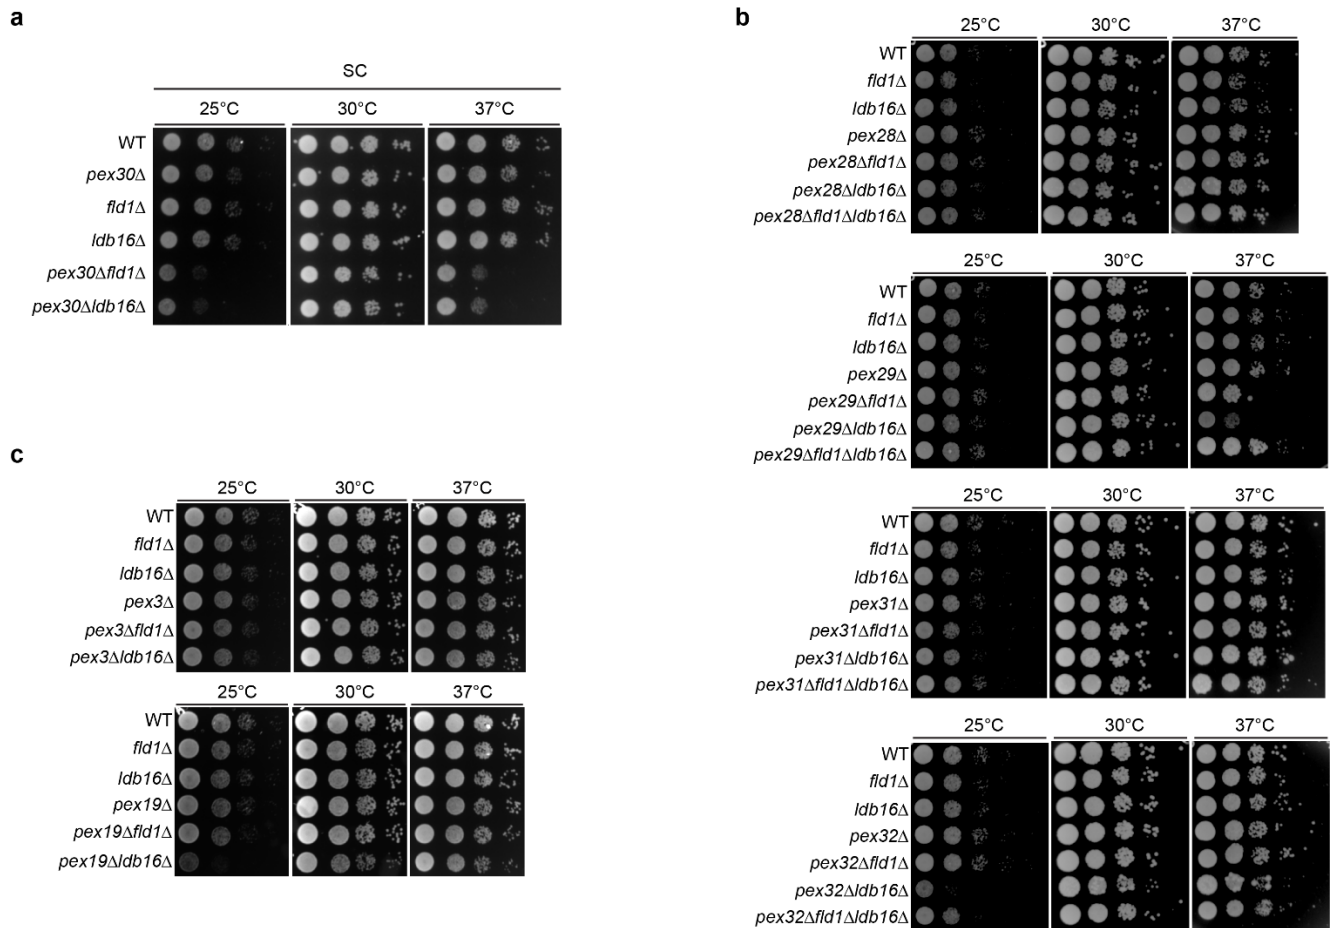

**Supplementary Figure 2. Growth defect in cells lacking Pex30 and seipin is specific and not due to general loss of peroxisomal function. (a)** 10-fold serial dilutions of cells with the indicated genotype were spotted on synthetic complete (SC) media and incubated at 25°C, 30°C or 37°C for 2 days. **(b)** Seipin does not interact genetically with other Pex30 family members. 10-fold serial dilutions of cells with the indicated genotype were spotted on YPD media and incubated at 25°C, 30°C or 37°C for 2 days. **(c)** Seipin does not interact genetically with components essential for peroxisome biogenesis. 10-fold serial dilutions of cells with the indicated genotype were spotted on YPD media and incubated at 25°C, 30°C or 37°C for 2 days.

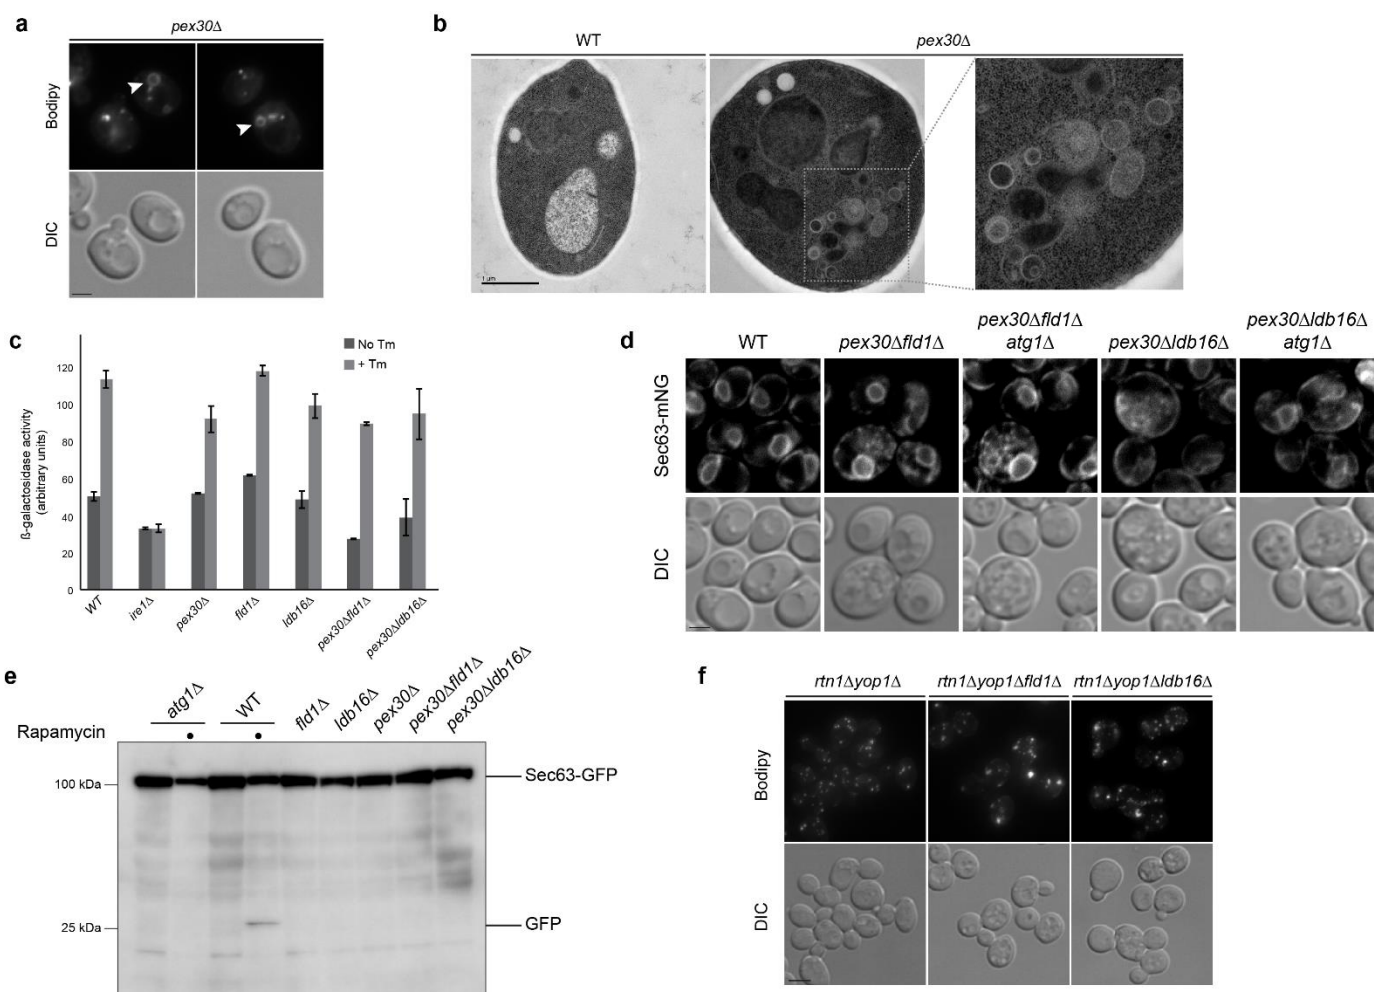

**Supplementary Figure 3. (a)** Although LDs appeared normal, a small fraction (4%) of *pex30Δ* cells displayed additional Bodipy-stained membranous-like structures (arrowheads). Bar 2 $\mu$ m. **(b)** Electron micrographs showing WT and *pex30Δ* cells. Please note that abnormal membranous structures were detected in a small fraction of *pex30Δ* cells. **(c)** *pex30Δfid1Δ* and *pex30Δldb16Δ* cells have basal UPR levels similar to WT and are capable of mounting an UPR response. UPR levels in cells with the indicated genotypes in absence (no tunicamycin, Tm) or presence (+ Tm) of ER stress, as determined by a  $\beta$ -galactosidase reporter assay. The average of two experiments is shown; error bars represent standard deviation. **(d)** Analysis of ER morphology in cells of the indicated genotype. The ER marker protein, Sec63, was endogenously tagged with monomeric NeonGreen (Sec63-mNG). Bar, 2 $\mu$ m. **(e)** Sec63-GFP degradation was analysed in the indicated genotype by Western blotting, using an anti-GFP antibody. WT and *atg1Δ* cells were treated with 200ng/mL rapamycin for 12 h to induce autophagy. GFP: free GFP fragment generated by degradation of Sec63-GFP. **(f)** Mutations in the reticulons Rtn1 and Yop1, major ER shaping proteins, do not result in dispersed Bodipy structures. Analysis of LDs in cells with the indicated genotype after staining with the neutral lipid dye Bodipy493/503. Bar 2 $\mu$ m.

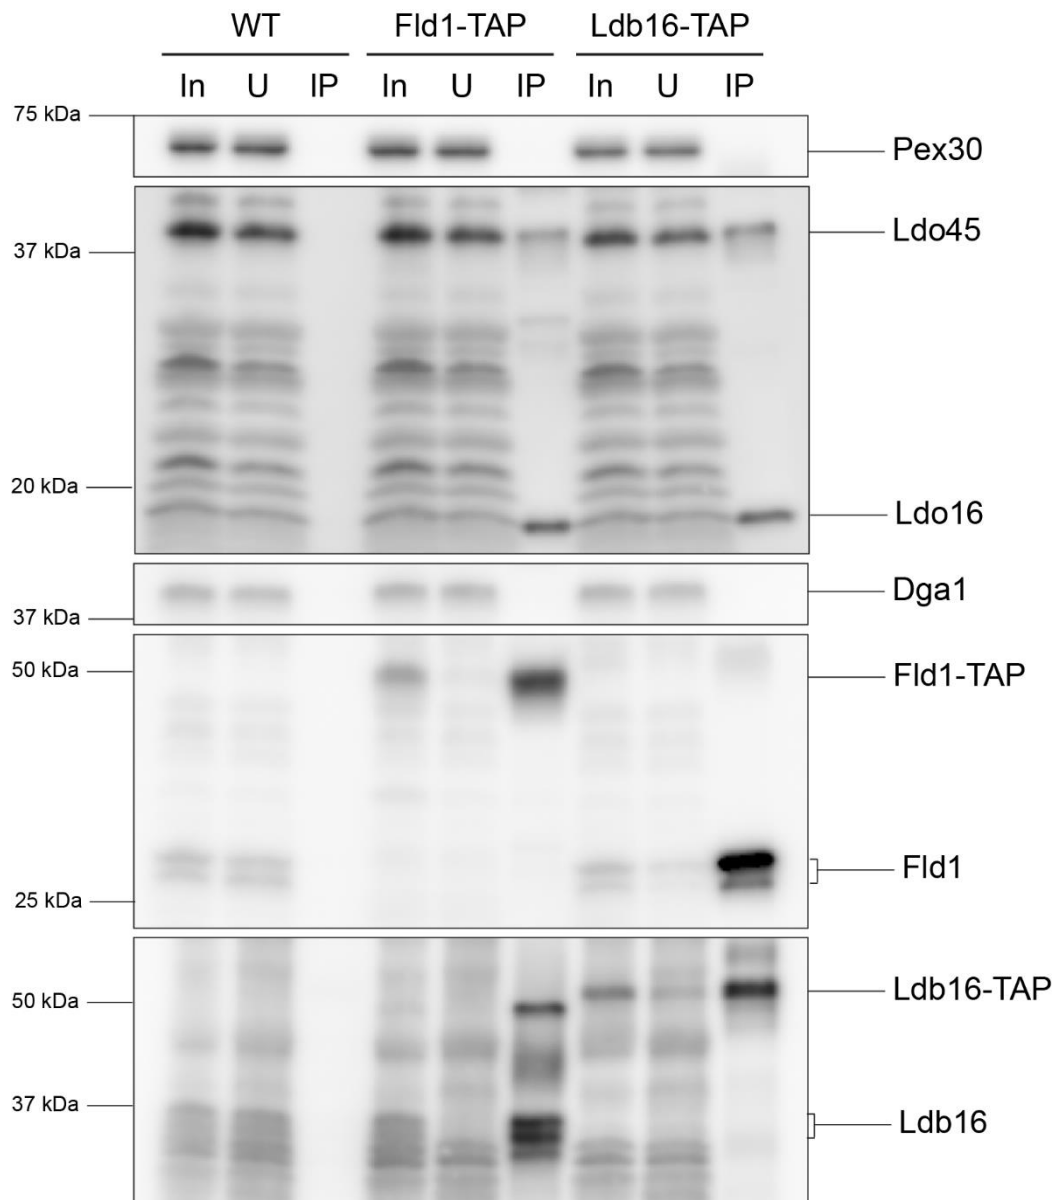

**Supplementary Figure 4. Pex30 is not stably associated with the seipin complex.** Detergent-solubilized extracts prepared from cells with the indicated genotype were immunoprecipitated (IP), and eluted proteins were analyzed by Western blotting. Endogenous Pex30 is not detected in seipin immunoprecipitates under conditions in which other components of the seipin complex components (Fld1, Ldb16, Ldo45 and Ldo16<sup>56,70</sup>) are detected.

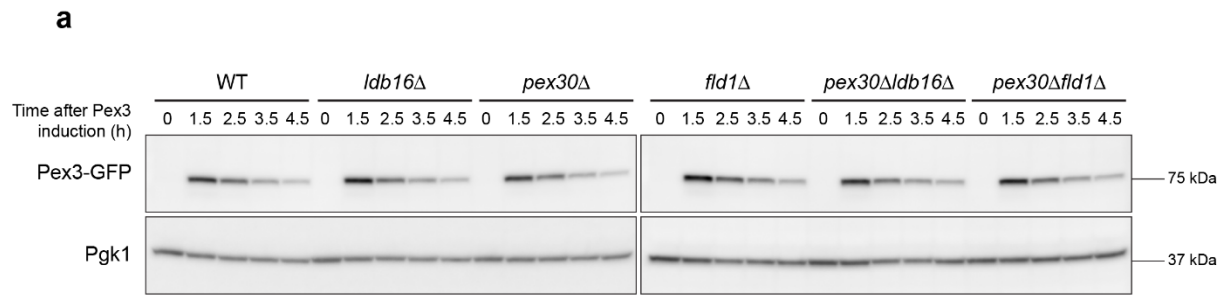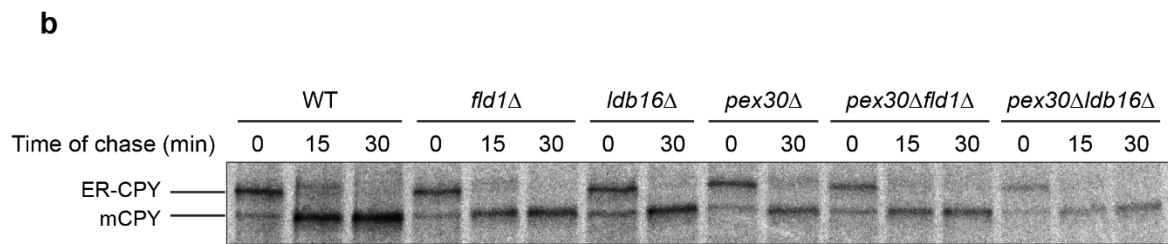

**Supplementary Figure 5. (a)** . Protein levels of GFP-Pex3 are similar in all cells during *de novo* peroxisome biogenesis. Levels of GFP-Pex3 at the indicated time points. Time point 0 corresponds to induction of GFP-Pex3 as depicted in Fig. 3a. At 30min time point GFP-Pex3 expression was repressed. Pgk1 was used as a loading control. **(b)** Maturation of endogenous Carboxypeptidase Y (CPY) in cells with the indicated genotype, as determined by pulse-chase. mCPY: mature, vacuolar form of CPY; ER-CPY: ER/golgi localized CPY.

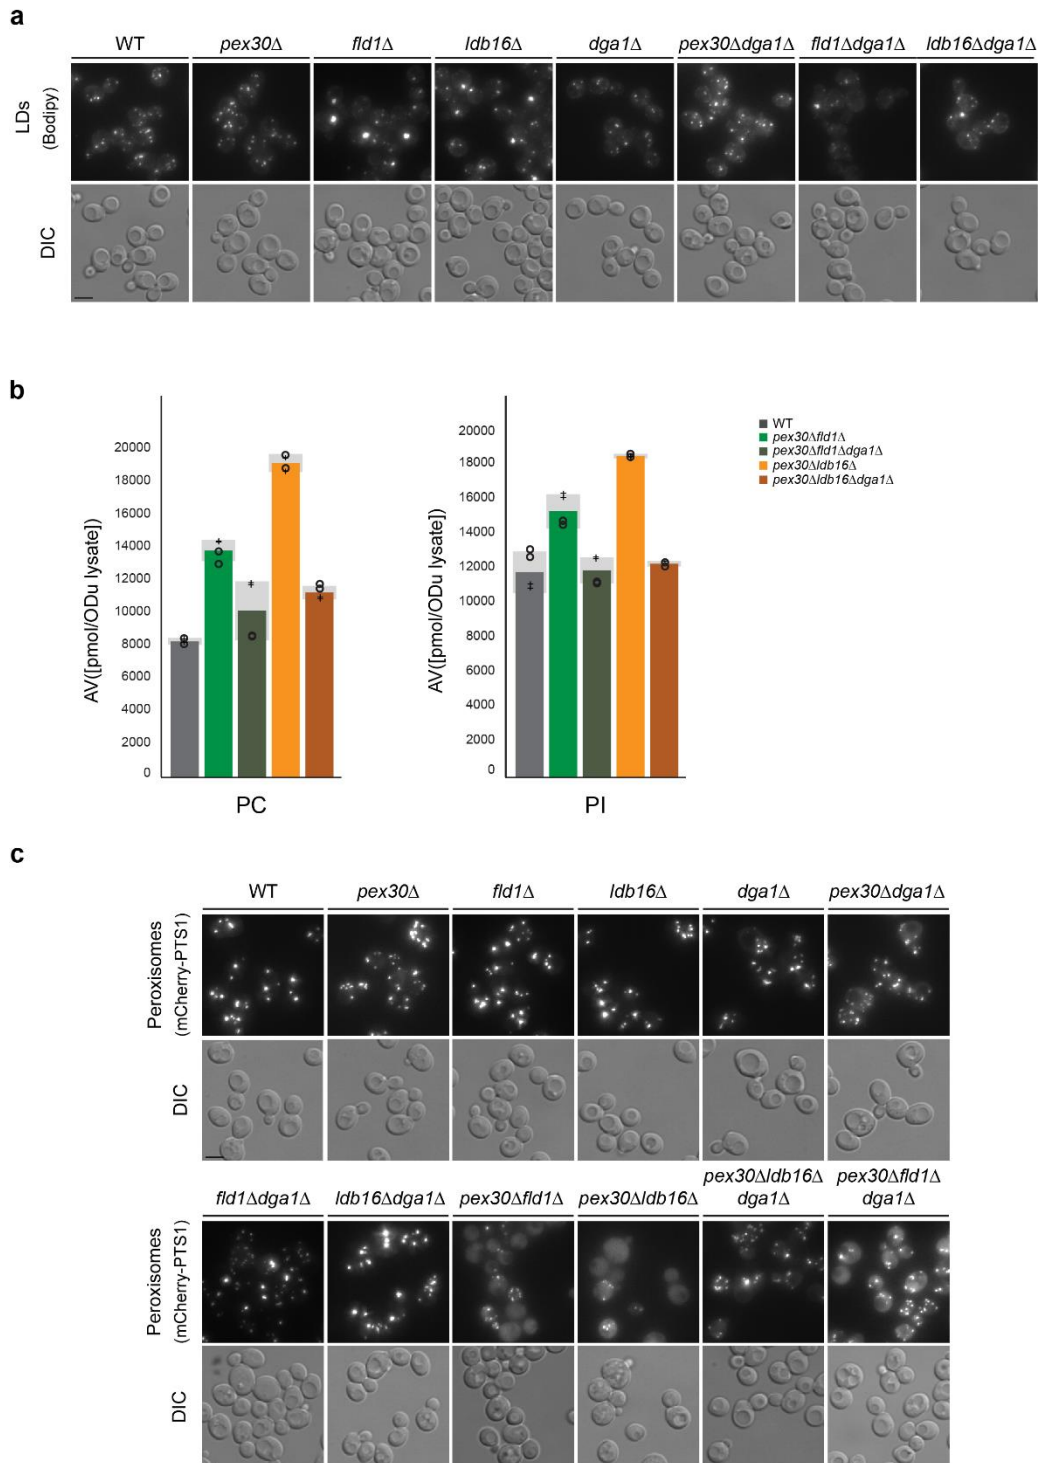

**Supplementary Figure 6. (a)** Cells with indicated genotype were stained with the neutral lipid dye Bodipy493/503. Bar 2  $\mu$ m. **(b)** In the absence of seipin and Pex30, phospholipid levels are corrected by a reduction in TAG synthesis. Levels of the major phospholipids phosphatidylcholine (PC, left) and phosphatidylinositol (PI, right) in cells with the indicated genotype, as detected by mass spectrometry. Graphs correspond to the average of two biological and two technical repeats. The four individual measurements are displayed (+). Light grey bars indicate standard deviation. **(c)** Peroxisome biogenesis defect in cells lacking seipin and Pex30 is reversed by reducing TAG in the ER. Distribution of functional peroxisomes in cells with the indicated genotype analysed by steady-state localization of mCherry-PTS1. Bar 2  $\mu$ m.



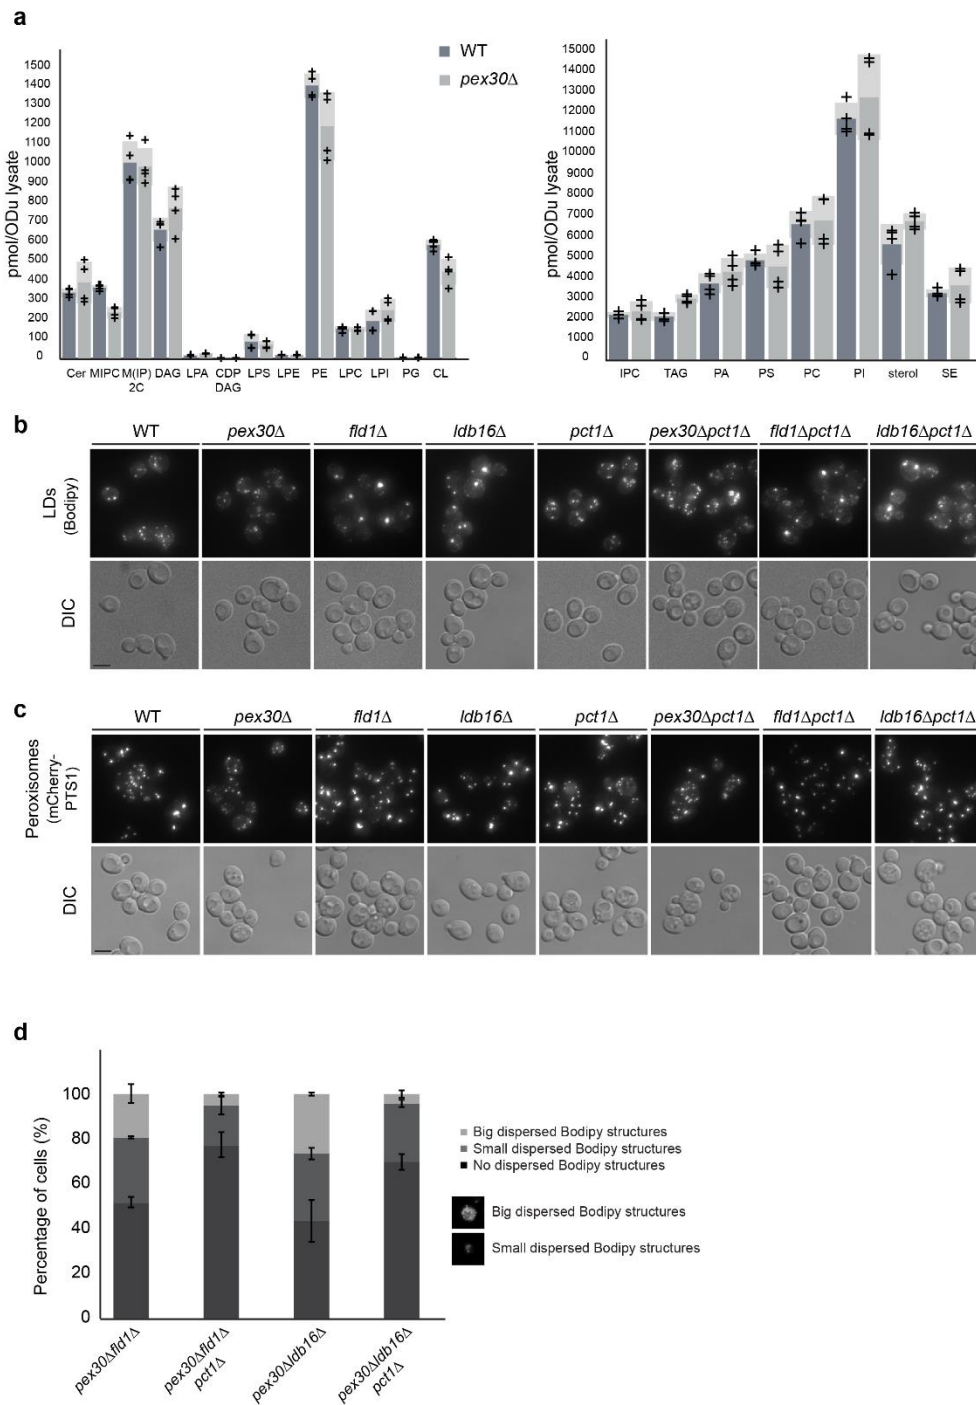

**Supplementary Figure 7. (a)** Global lipid composition of *pex30Δ* is similar to WT, as determined by shotgun lipidomics. Low and high abundance lipids are shown on the left and right graphs, respectively. Graphs correspond to the average of two biological and two technical repeats. The four individual measurements are displayed (+). Light grey bars indicate standard deviation. **(b)** Analysis of LDs in cells with the indicated genotype after staining with the neutral lipid dye Bodipy493/503. Bar 2μm. **(c)** Distribution of functional peroxisomes in cells with the indicated genotype analysed by steady-state localization of mCherry-PTS1. Bar 2μm. **(d)** Quantification of dispersed Bodipy structures in cells with the indicated genotype. Data corresponds to the average of two experiments (>100cells/genotype/experiment were counted).



**Supplementary Table 1- proteins increased in LDs isolated from *fld1Δ*, as determined by label free quantitative mass spectrometry.**

| Name       |          | <i>fld1Δ</i> |          |
|------------|----------|--------------|----------|
| Systematic | Standard | logFC        | p Value  |
| YHL020C    | OPI1     | 5.489566     | 1.46E-04 |
| YLR324W    | PEX30    | 5.063149     | 1.35E-05 |
| YDR479C    | PEX29    | 4.540304     | 8.46E-04 |
| YNL044W    | YIP3     | 4.432404     | 1.02E-05 |
| YDR120C    | TRM1     | 4.208153     | 9.99E-04 |
| YML059C    | NTE1     | 4.167676     | 3.16E-04 |
| YPR097W    | YPR097W  | 3.716108     | 1.17E-04 |
| YLL040C    | VPS13    | 2.827194     | 6.16E-04 |
| YLR380W    | CSR1     | 2.803219     | 4.00E-04 |
| YGL140C    | YGL140C  | 2.778662     | 4.69E-04 |
| YNL287W    | SEC21    | 2.568726     | 3.87E-04 |
| YML020W    | YML020W  | 2.546242     | 7.84E-04 |
| YGR157W    | CHO2     | 2.517351     | 4.84E-04 |
| YGR202C    | PCT1     | 2.473526     | 8.19E-04 |
| YPR028W    | YOP1     | 2.347473     | 8.20E-04 |
| YDL029W    | ARP2     | 2.114199     | 8.58E-04 |

**Supplementary Table 2- proteins increased in LDs isolated from *ldb16Δ*, as determined by label free quantitative mass spectrometry.**

| Name       |          | <i>ldb16Δ</i> |          |
|------------|----------|---------------|----------|
| Systematic | Standard | logFC         | p Value  |
| YHL020C    | OPI1     | 4.20386       | 6.32E-06 |
| YLR324W    | PEX30    | 4.173158      | 4.11E-07 |
| YML059C    | NTE1     | 4.010077      | 9.84E-05 |
| YNL044W    | YIP3     | 3.824956      | 8.55E-07 |
| YIL041W    | GVP36    | 2.775928      | 8.10E-05 |
| YPR097W    | YPR097W  | 2.281816      | 6.38E-04 |
| YGR202C    | PCT1     | 2.180898      | 3.08E-04 |

A cut-off of LogFC  $\geq 2$  and p value  $< 0.001$  was applied in both cases.

### Supplementary Table 3. Yeast strains used in this study

| Strains  | Genotype                                                                                              |
|----------|-------------------------------------------------------------------------------------------------------|
| BY4741   | <i>Mat a ura3Δ0his3Δ1leu2Δ0met15Δ0</i>                                                                |
| yPC3975  | <i>Mat a ura3Δ0his3Δ1leu2Δ0met15Δ0fld1Δ::KAN</i>                                                      |
| yPC4246  | <i>Mat a ura3Δ0his3Δ1leu2Δ0met15Δ0ldb16Δ::KAN</i>                                                     |
| yPC8808  | <i>Mat a ura3Δ0his3Δ1leu2Δ0met15Δ0pex30Δ::KAN</i>                                                     |
| yPC8849  | <i>Mat a ura3Δ0his3Δ1leu2Δ0met15Δ0pex30Δ::KAN fld1Δ::NAT</i>                                          |
| yPC8851  | <i>Mat α ura3Δ0his3Δ1leu2Δ0met15Δ0pex30Δ::KAN ldb16Δ::HYGB</i>                                        |
| yPC8850  | <i>Mat α ura3Δ0his3Δ1leu2Δ0met15Δ0pex30Δ::KAN fld1Δ::NAT ldb16Δ::HYGB</i>                             |
| yPC5561  | <i>Mat a ura3Δ0his3Δ1leu2Δ0met15Δ0 PEX30-GFP-HIS3</i>                                                 |
| yPC5680  | <i>Mat ? ura3Δ0his3Δ1leu2Δ0met15Δ0fld1Δ::NAT PEX30-GFP-HIS3</i>                                       |
| yPC5678  | <i>Mat ? ura3Δ0his3Δ1leu2Δ0met15Δ0ldb16Δ::HYGB PEX30-GFP-HIS3</i>                                     |
| yPC10657 | <i>Mat a ura3Δ0his3Δ1leu2Δ0met15Δ0 PEX30-mNeonGreen-HIS3</i>                                          |
| yPC10676 | <i>Mat ? ura3Δ0his3Δ1leu2Δ0met15Δ0fld1Δ::NAT PEX30-mNeonGreen-HIS3</i>                                |
| yPC10678 | <i>Mat ? ura3Δ0his3Δ1leu2Δ0met15Δ0ldb16Δ::HYGB PEX30-mNeonGreen-HIS3</i>                              |
| yPC9035  | <i>Mat a ura3Δ0his3Δ1leu2Δ0met15Δ0pex3Δ::KAN</i>                                                      |
| yPC9880  | <i>Mat ? ura3Δ0his3Δ1leu2Δ0met15Δ0pex3Δ::KANfld1Δ::NAT</i>                                            |
| yPC9881  | <i>Mat ? ura3Δ0his3Δ1leu2Δ0met15Δ0pex3Δ::KANldb16Δ::HYGB</i>                                          |
| yPC9838  | <i>Mat a ura3Δ0his3Δ1leu2Δ0met15Δ0pex19Δ::KAN</i>                                                     |
| yPC9858  | <i>Mat ? ura3Δ0his3Δ1leu2Δ0met15Δ0pex19Δ::KANfld1Δ::NAT</i>                                           |
| yPC9860  | <i>Mat ? ura3Δ0his3Δ1leu2Δ0met15Δ0pex19Δ::KANldb16Δ::HYGB</i>                                         |
| yPC10902 | <i>Mat a ura3Δ0his3Δ1leu2Δ0met15Δ0NAT::Gal1::GFP-Pex3 mCherry-PTS1::HIS3</i>                          |
| yPC10904 | <i>Mat a ura3Δ0his3Δ1leu2Δ0met15Δ0ldb16Δ::HYGB NAT::Gal1::GFP-Pex3 mCherry-PTS1::HIS3</i>             |
| yPC10906 | <i>Mat ? ura3Δ0his3Δ1leu2Δ0met15Δ0pex30Δ::KAN NAT::Gal1::GFP-Pex3 mCherry-PTS1::HIS3</i>              |
| yPC10909 | <i>Mat ? ura3Δ0his3Δ1leu2Δ0met15Δ0pex30Δ::KAN ldb16Δ::HYGB NAT::Gal1::GFP-Pex3 mCherry-PTS1::HIS3</i> |
| yPC10964 | <i>Mat ? ura3Δ0his3Δ1leu2Δ0met15Δ0pex30Δ::KANfld1Δ::NAT NAT::Gal1::GFP-Pex3 mCherry-PTS1::HIS3</i>    |
| yPC10965 | <i>Mat ? ura3Δ0his3Δ1leu2Δ0met15Δ0fld1Δ::NAT NAT::Gal1::GFP-Pex3 mCherry-PTS1::HIS3</i>               |
| yPC10613 | <i>Mat a ura3Δ0his3Δ1leu2Δ0met15Δ0 SEC63-mNeonGreen-HIS3</i>                                          |
| yPC10614 | <i>Mat a ura3Δ0his3Δ1leu2Δ0met15Δ0pex30Δ::KAN SEC63-mNeonGreen-HIS3</i>                               |
| yPC10615 | <i>Mat a ura3Δ0his3Δ1leu2Δ0met15Δ0fld1Δ::KAN SEC63-mNeonGreen-HIS3</i>                                |
| yPC10616 | <i>Mat a ura3Δ0his3Δ1leu2Δ0met15Δ0ldb16Δ::KAN SEC63-mNeonGreen-HIS3</i>                               |
| yPC10617 | <i>Mat a ura3Δ0his3Δ1leu2Δ0met15Δ0pex30Δ::KAN fld1Δ::NAT SEC63-mNeonGreen-HIS3</i>                    |
| yPC10618 | <i>Mat α ura3Δ0his3Δ1leu2Δ0met15Δ0pex30Δ::KAN ldb16Δ::HYGB SEC63-mNeonGreen-HIS3</i>                  |
| yPC10692 | <i>Mat ? ura3Δ0his3Δ1leu2Δ0met15Δ0 FLD1-tdTomato-HIS3 NAT::Gal1::GFP-Pex3</i>                         |
| yPC4060  | <i>Mat a ura3Δ0his3Δ1leu2Δ0met15Δ0dga1Δ::KAN</i>                                                      |
| yPC5416  | <i>Mat ? ura3Δ0his3Δ1leu2Δ0met15Δ0dga1Δ::NAT ldb16Δ::HYGB</i>                                         |
| yPC10625 | <i>Mat ? ura3Δ0his3Δ1leu2Δ0met15Δ0pex30Δ::KAN dga1Δ::KAN</i>                                          |
| yPC10626 | <i>Mat ? ura3Δ0his3Δ1leu2Δ0met15Δ0pex30Δ::KAN dga1Δ::KANldb16Δ::HYGB</i>                              |
| yPC10695 | <i>Mat ? ura3Δ0his3Δ1leu2Δ0met15Δ0dga1Δ::NAT fld1Δ::HYGB</i>                                          |
| yPC10694 | <i>Mat ? ura3Δ0his3Δ1leu2Δ0met15Δ0 pex30Δ::KAN dga1Δ::NAT fld1Δ::HYGB</i>                             |
| yPC10718 | <i>Mat ? ura3Δ0his3Δ1leu2Δ0met15Δ0 mCherry-PTS1-HIS3</i>                                              |
| yPC10719 | <i>Mat ? ura3Δ0his3Δ1leu2Δ0met15Δ0 pex30Δ::KAN mCherry-PTS1-HIS3</i>                                  |
| yPC10720 | <i>Mat ? ura3Δ0his3Δ1leu2Δ0met15Δ0 ldb16Δ::HYGB mCherry-PTS1-HIS3</i>                                 |
| yPC10721 | <i>Mat ? ura3Δ0his3Δ1leu2Δ0met15Δ0 dga1Δ::NAT mCherry-PTS1-HIS3</i>                                   |
| yPC10723 | <i>Mat ? ura3Δ0his3Δ1leu2Δ0met15Δ0 ldb16Δ::HYGB dga1Δ::NAT mCherry-PTS1-HIS3</i>                      |
| yPC10724 | <i>Mat ? ura3Δ0his3Δ1leu2Δ0met15Δ0 pex30Δ::KAN dga1Δ::NAT mCherry-PTS1-HIS3</i>                       |
| yPC10725 | <i>Mat ? ura3Δ0his3Δ1leu2Δ0met15Δ0 pex30Δ::KAN ldb16Δ::HYGB mCherry-PTS1-HIS3</i>                     |
| yPC10726 | <i>Mat ? ura3Δ0his3Δ1leu2Δ0met15Δ0 pex30Δ::KAN ldb16Δ::HYGB dga1Δ::NAT mCherry-PTS1-HIS3</i>          |
| yPC5251  | <i>Mat a ura3Δ0his3Δ1leu2Δ0met15Δ0pct1Δ::KAN</i>                                                      |
| yPC5631  | <i>Mat ? ura3Δ0his3Δ1leu2Δ0met15Δ0pct1Δ::KAN fld1Δ::NAT</i>                                           |
| yPC10622 | <i>Mat α ura3Δ0his3Δ1leu2Δ0met15Δ0pct1Δ::KAN pex30Δ::HIS3</i>                                         |

yPC10623 *Mat ? ura3Δ0his3Δ1leu2Δ0met15Δ0pct1Δ::KAN pex30Δ::HIS3 fld1Δ::NAT*  
yPC10700 *Mat ? ura3Δ0his3Δ1leu2Δ0met15Δ0 pex30Δ::HIS3pct1Δ::KAN ldb16Δ::HYGB*  
yPC10702 *Mat ? ura3Δ0his3Δ1leu2Δ0met15Δ0 pct1Δ::KAN ldb16Δ::HYGB*  
yPC10716 *Mat ? ura3Δ0his3Δ1leu2Δ0met15Δ0 pct1Δ::KAN mCherry-PTS1-HIS3*  
yPC10713 *Mat ? ura3Δ0his3Δ1leu2Δ0met15Δ0 pct1Δ::KAN ldb16Δ::HYGB mCherry-PTS1-HIS3*  
yPC10714 *Mat ? ura3Δ0his3Δ1leu2Δ0met15Δ0 pex30Δ::HIS3pct1Δ::KAN mCherry-PTS1-HIS3*  
yPC10711 *Mat ? ura3Δ0his3Δ1leu2Δ0met15Δ0 pex30Δ::HIS3 ldb16Δ::HYGB pct1Δ::KAN mCherry-PTS1-HIS3*  
yPC10963 *Mat ? ura3Δ0his3Δ1leu2Δ0met15Δ0 fld1Δ::NAT mCherry-PTS1-HIS3*  
yPC10746 *Mat ? ura3Δ0his3Δ1leu2Δ0met15Δ0 pex30Δ::HIS3fld1Δ::NAT mCherry-PTS1-HIS3*  
yPC10748 *Mat ? ura3Δ0his3Δ1leu2Δ0met15Δ0 fld1Δ::HYGB dga1Δ::NAT mCherry-PTS1-HIS3*  
yPC10744 *Mat ? ura3Δ0his3Δ1leu2Δ0met15Δ0 pct1Δ::KAN fld1Δ::NAT mCherry-PTS1-HIS3*  
yPC10750 *Mat ? ura3Δ0his3Δ1leu2Δ0met15Δ0 pex30Δ::KANfld1Δ::HYGB dga1Δ::NAT mCherry-PTS1-HIS3*  
yPC10745 *Mat ? ura3Δ0his3Δ1leu2Δ0met15Δ0 pex30Δ::HIS3pct1Δ::KAN fld1Δ::NAT mCherry-PTS1-HIS3*  
yPC10688 *Mat a ura3Δ0his3Δ1leu2Δ0met15Δ0 GFP-PEX14-URA*  
yPC10689 *Mat ? ura3Δ0his3Δ1leu2Δ0met15Δ0 fld1Δ::NAT GFP-PEX14-URA*  
yPC10690 *Mat ? ura3Δ0his3Δ1leu2Δ0met15Δ0pex30Δ::KAN fld1Δ::NAT GFP-PEX14-URA*  
yPC10762 *Mat a ura3Δ0his3Δ1leu2Δ0met15Δ0pex30Δ::KAN GFP-PEX14-URA*  
yPC10974 *Mat a ura3Δ0his3Δ1leu2Δ0met15Δ0ldb16Δ::KAN GFP-PEX14-URA*  
yPC11048 *Mat a ura3Δ0his3Δ1leu2Δ0met15Δ0pex30Δ::KAN ldb16::HYGB GFP-PEX14-URA*  
yPC10893 *Mat ? ura3Δ0his3Δ1leu2Δ0met15Δ0 fld1::HYGB dga1::NAT Sec63-mNeonGreen-HIS*  
yPC10894 *Mat ? ura3Δ0his3Δ1leu2Δ0met15Δ0 pex30::KAN fld1::HYGB dga1::NAT Sec63-mNeonGreen-HIS*  
yPC10660 *Mat a ura3Δ0his3Δ1leu2Δ0met15Δ0 dga1::KAN Sec63-mNeonGreen-HIS*  
yPC10661 *Mat ? ura3Δ0his3Δ1leu2Δ0met15Δ0 dga1::NAT ldb16::HYGB Sec63-mNeonGreen-HIS*  
yPC10662 *Mat ? ura3Δ0his3Δ1leu2Δ0met15Δ0 pex30::KAN dga1::NAT Sec63-mNeonGreen-HIS*  
yPC10663 *Mat ? ura3Δ0his3Δ1leu2Δ0met15Δ0 pex30::KAN dga1::NAT ldb16::HYGB Sec63-mNeonGreen-HIS*  
yPC10895 *Mat a ura3Δ0his3Δ1leu2Δ0met15Δ0 PEX30-mNeonGreen-HIS SEC63-mCherry-URA*  
yPC10896 *Mat ? ura3Δ0his3Δ1leu2Δ0met15Δ0 fld1::NAT PEX30-mNeonGreen-HIS SEC63-mCherry-URA*  
yPC10897 *Mat ? ura3Δ0his3Δ1leu2Δ0met15Δ0 ldb16::HYGB PEX30-mNeonGreen-HIS SEC63-mCherry-URA*  
yPC3421 *Mat a ura3Δ0his3Δ1leu2Δ0met15Δ0 LDB16-TAP-HIS5*  
yPC3389 *Mat a ura3Δ0his3Δ1leu2Δ0met15Δ0 FLD1-TAP-HIS5*  
yPC10698 *Mat a ura3Δ0his3Δ1leu2Δ0met15Δ0 PEX30-mNeonGreen-HIS FLD1-tdTomato-HIS*  
yPC1573 *Mat a ura3Δ0his3Δ1leu2Δ0met15Δ0 Sec63-GFP-HIS5*  
yPC8122 *Mat a ura3Δ0his3Δ1leu2Δ0met15Δ0 fld1::NAT Sec63-GFP-HIS5*  
yPC8121 *Mat a ura3Δ0his3Δ1leu2Δ0met15Δ0 ldb16::NAT Sec63-GFP-HIS5*  
yPC11050 *Mat a ura3Δ0his3Δ1leu2Δ0met15Δ0 pex30::KAN Sec63-GFP-HIS5*  
yPC11051 *Mat a ura3Δ0his3Δ1leu2Δ0met15Δ0 pex30::KAN fld1::NAT Sec63-GFP-HIS5*  
yPC11053 *Mat a ura3Δ0his3Δ1leu2Δ0met15Δ0 pex30::KAN ldb16::NAT Sec63-GFP-HIS5*  
yPC11087 *Mat a ura3Δ0his3Δ1leu2Δ0met15Δ0 atg1::KAN Sec63-GFP-HIS5*  
yPC11080 *Mat ? ura3Δ0his3Δ1leu2Δ0met15Δ0 pex30::KAN PEX14-GFP-URA SEC63-tdTomato-HIS*  
yPC11081 *Mat ? ura3Δ0his3Δ1leu2Δ0met15Δ0 PEX14-GFP-URA SEC63-tdTomato-HIS*  
yPC11082 *Mat ? ura3Δ0his3Δ1leu2Δ0met15Δ0 ldb16::KAN PEX14-GFP-URA SEC63-tdTomato-HIS*  
yPC11083 *Mat a ura3Δ0his3Δ1leu2Δ0met15Δ0pex30Δ::KAN atg1::HYGB SEC63-mNeonGreen-HIS3*  
yPC11084 *Mat a ura3Δ0his3Δ1leu2Δ0met15Δ0fld1Δ::KAN atg1::HYGB SEC63-mNeonGreen-HIS3*  
yPC11085 *Mat a ura3Δ0his3Δ1leu2Δ0met15Δ0ldb16Δ::KAN atg1::HYGB SEC63-mNeonGreen-HIS3*  
yPC11086 *Mat a ura3Δ0his3Δ1leu2Δ0met15Δ0pex30Δ::KAN ldb16Δ::HYGB atg1::NAT SEC63-mNeonGreen-HIS3*  
yPC11088 *Mat a ura3Δ0his3Δ1leu2Δ0met15Δ0pex30Δ::KAN fld1Δ::NAT atg1::HYGB SEC63-mNeonGreen-HIS3*  
yPC11089 *Mat ? ura3Δ0his3Δ1leu2Δ0met15Δ0 pex30::KAN fld1::NAT PEX14-GFP-URA SEC63-tdTomato-HIS*  
yPC11090 *Mat ? ura3Δ0his3Δ1leu2Δ0met15Δ0 fld1::NAT PEX14-GFP-URA SEC63-tdTomato-HIS*  
yPC8806 *Mat a ura3Δ0his3Δ1leu2Δ0met15Δ0pex28Δ::KAN*

yPC8845 *Mat ? ura3Δ0his3Δ1leu2Δ0met15Δ0pex28Δ::KAN fld1::NAT*  
yPC8844 *Mat ? ura3Δ0his3Δ1leu2Δ0met15Δ0pex28Δ::KAN ldb16::HYGB*  
yPC8843 *Mat ? ura3Δ0his3Δ1leu2Δ0met15Δ0pex28Δ::KAN fld1::NAT ldb16::HYGB*  
yPC8807 *Mat a ura3Δ0his3Δ1leu2Δ0met15Δ0pex29Δ::KAN*  
yPC8848 *Mat ? ura3Δ0his3Δ1leu2Δ0met15Δ0pex29Δ::KAN fld1::NAT*  
yPC8847 *Mat ? ura3Δ0his3Δ1leu2Δ0met15Δ0pex29Δ::KAN ldb16::HYGB*  
yPC8846 *Mat ? ura3Δ0his3Δ1leu2Δ0met15Δ0pex29Δ::KAN fld1::NAT ldb16::HYGB*  
yPC8809 *Mat a ura3Δ0his3Δ1leu2Δ0met15Δ0pex31Δ::KAN*  
yPC8855 *Mat ? ura3Δ0his3Δ1leu2Δ0met15Δ0pex31Δ::KAN fld1::NAT*  
yPC8854 *Mat ? ura3Δ0his3Δ1leu2Δ0met15Δ0pex31Δ::KAN ldb16::HYGB*  
yPC8856 *Mat ? ura3Δ0his3Δ1leu2Δ0met15Δ0pex31Δ::KAN fld1::NAT ldb16::HYGB*  
yPC8810 *Mat a ura3Δ0his3Δ1leu2Δ0met15Δ0pex32Δ::KAN*  
yPC8858 *Mat ? ura3Δ0his3Δ1leu2Δ0met15Δ0pex32Δ::KAN fld1::NAT*  
yPC8860 *Mat ? ura3Δ0his3Δ1leu2Δ0met15Δ0pex32Δ::KAN ldb16::HYGB*  
yPC8857 *Mat ? ura3Δ0his3Δ1leu2Δ0met15Δ0pex32Δ::KAN fld1::NAT ldb16::HYGB*
